# Supplementary material for: Prevalence, types and determinants of anemia among pregnant women in Sudan: a systematic review and meta-analysis
Source: BMC Hematol. 2018 Nov 8;18:31. doi: 10.1186/s12878-018-0124-1 (PMC6225563; doi:10.1186/s12878-018-0124-1)
Supplement: Supplementary file 1 — Assessment of publication bias. (XLSX 13 kb) [file 12878_2018_124_MOESM1_ESM.xlsx]

## Sheet: Sheet1
The Modified Newcastle Ottawa Scale for cross -sectional studies
The Author	Year	Location	Selection	Comparability	Exposure	Total
Abas et al.,	2017	Khartoum	3	1	2	6
Abdelgadir et al.,	2012	Geizera	2	1	2	5
Abdelrahman	2012	Khartoum	3	1	2	6
Abdelrahim et al.,	2009	Gadarif	2	2	2	6
Abdullahi et al.,	2014	Khartoum	3	2	2	7
Adam a et al.,	2005	New Halfa	2	2	2	6
Adam b et al.,	2005	New Halfa	2	2	3	7
Adam c et al.,	2007	New Halfa	3	2	2	7
Adam d et al.,	2012	Geizera	3	1	2	6
Ali et al.,	2011	Kassala	3	2	2	7
Bushra et al.,	2010	Geizera	3	1	2	6
Elmugabil et al.,	2017	Khartoum	3	2	2	7
Haggaz et al.,	2010	Darfur	2	2	2	6
Mohamed et al.,	2011	Kassala	3	1	2	6
Mubarak et al.,	2014	Khartoum	3	1	2	6
Omer et al.,	2017	Blue Nile	3	2	3	8
