# Supplementary material for: Prevalence, types and determinants of anemia among pregnant women in Sudan: a systematic review and meta-analysis
Source: BMC Hematol. 2018 Nov 8;18:31. doi: 10.1186/s12878-018-0124-1 (PMC6225563; doi:10.1186/s12878-018-0124-1)
Supplement: Supplementary file 2 — Characteristics of all studies included in the systematic review and meta-analysis. (XLSX 13 kb) [file 12878_2018_124_MOESM2_ESM.xlsx]

## Sheet: Sheet1
Characteristics of all studies included in the systematic review and meta-analysis
The study	Year	Reference	Location	Number of participants	Prevalence of anemia%	Number of anemic	Number of non anemic	Age of the anemic	SD	Age non-anemic	SD	Parity in no-anemic	SD	Parity in anemic	SD	Gestational age	Method used to measure hemoglobin	Type of anemia
Abas et al.,	2017	19	Khartoum	423	57.68	244	179	26	6.4	26.2	5.8	1.7	2.2	1.8	2.3	10.7 weeks	was not mentioned	Iron deficiency anemia = 12.1%, ( 51/423)
Abdelgadir et al.,	2012	14	Geizera	292	40.75	119	173	25.8	5.5	25.3	5.2	2.4	2.1	2.8	2.2	24.3 weeks	HemoCue haemoglobinometer (HemoCue AB, Angelhom, Sweden).	NA
Abdelrahman	2012	17	Khartoum	194	24.23	47	147	26.1	4.8	26.2	4.6	1.3	2.3	1.4	1.4	21.4 weeks	Sysmex KX21N, hemoanalyzer,	57/194(29.3%) iron deficiency anemia
Abdelrahim et al.,	2009	10	Gadarif	300	74.67	224	76	26.7	5.6	26.8	5.7	1.9	1..7	1.9	1.7	At delivery	HemoCue haemoglobinometer (HemoCue AB, Angelhom, Sweden).	Iron deficiency anemia was11.1% (33/300), 57.7 and 1% had folate and B12 deficiency
Abdullahi et al.,	2014	21	Khartoum	856	47.78	409	447	28.1	6.4	28.1	6.6	2.8	2.2	2.9	2.2	At delivery	Sysmex KX21N, hemoanalyzer,	NA
Adam a et al.,	2005	9	New Halfa	744	62.63	466	278	26.2	5.6	25.6	4.8	2	1.9	2.3	2.3	27.7 weeks	HemoCue haemoglobinometer (HemoCue AB, Angelhom, Sweden).	NA
Adam b et al.,	2005	22	New Halfa	125	76	95	30	25.9	5.5	25.7	6	2.1	2.2	2.4	2.4	26.3 week	HemoCue haemoglobinometer (HemoCue AB, Angelhom, Sweden).	NA
Adam c et al.,	2007	23	New Halfa	333	36.94	123	201	25.6	5.9	25.5	6.7	2.4	2.1	2.5	2.2	At delivery	HemoCue haemoglobinometer (HemoCue AB, Angelhom, Sweden).	NA
Adam d et al.,	2012	14	Geizera	324	62.04	201	123	26.7	5.6	26.8	5.7	1.7	1.8	1.9	2.1	At delivery	HemoCue haemoglobinometer (HemoCue AB, Angelhom, Sweden).	NA
Ali et al.,	2011	24	Kassala	9578	41.89	4012	5566	27.8	5	27.7	6.1	1.9	1.7	1.9	1.7	At delivery	was not mentioned	NA
Bushra et al.,	2010	12	Geizera	200	52	104	96	26.3	5.6	27	6	1.9	1.7	1.9	1.7	30.7weeks	HemoCue haemoglobinometer (HemoCue AB, Angelhom, Sweden).	13/200 (6.5%), 45.0 Zinc and 4.0 Copper
Elmugabil et al.,	2017	18	Khartoum	338	49.7	168	170	28.2	5.7	27.4	5.3	2.2	1.5	2.3	1.8	10.5 weeks	Sysmex KX21N, hemoanalyzer,	NA
Haggaz et al.,	2010	11	Darfur	403	74.69	301	102	25.4	6.1	25.5	5.6	3	2.1	2.8	2.3	At delivery	HemoCue haemoglobinometer (HemoCue AB, Angelhom, Sweden).	NA
Mohamed et al.,	2011	13	Kassala	250	58.4	146	104	28.2	5.6	28.9	5.5	1.7	2.4	1.8	1.4	27.9 week	HemoCue haemoglobinometer (HemoCue AB, Angelhom, Sweden).	Iron deficiency anemia was 14.8, IDA (37/250), 38% had zinc deficiency
Mubarak et al.,	2014	15	Khartoum	179	23.46	42	137	27	6	25.6	5.7	1.6	1.8	1.7	1.8	25.1 weeks	Sysmex KX21N, hemoanalyzer,	Iron deficiency anemia was 10.6% (19/179)
Omer et al.,	2017	20	Blue Nile	1149	64.66	743	406	26.6	4.6	26.2	4.8	1.9	2	1.8	1.5	At delivery	HemoCue haemoglobinometer (HemoCue AB, Angelhom, Sweden).	NA
Total				15688		7444	8235	26.6625	5.61875	26.5312	5.63125	2.03125	2	2.13125	1.9375
